# Supplementary material for: Low-level expression of necroptosis factors indicates a poor prognosis of the squamous cell carcinoma subtype of non-small-cell lung cancer
Source: PubMed Central journal article supplement — Transl Lung Cancer Res. 2021 Mar;10(3):1221–30. doi: 10.21037/tlcr-20-1027 (PMC8044481; doi:10.21037/tlcr-20-1027), 2021-03
Supplement: tlcr-10-03-1221-supplementary.pdf [file tlcr-10-03-1221-supplementary.pdf]

**Table S1** Survival of the patients with stage I NSCLC by clinicopathological variables

| Variables               | Categories    | Wald   | HR (95% CI) <sup>a</sup> | P value |
|-------------------------|---------------|--------|--------------------------|---------|
| Age                     |               | 13.608 | 1.036 (1.017–1.056)      | <0.001  |
| Gender                  | Men           | 3.510  | 1                        | 0.061   |
|                         | Women         |        | 0.696 (0.476–1.017)      |         |
| Smoking habit           | Never         | 0.297  | 1                        | 0.586   |
|                         | Ever          |        | 1.107 (0.767–1.598)      |         |
| ECOG performance status | 0–1           | 0.313  | 1                        | 0.576   |
|                         | 2 or more     |        | 0.752 (0.278–2.039)      |         |
| CCIS                    | 0             | 4.613  | 1                        | 0.100   |
|                         | 1             |        | 1.167 (0.800–1.702)      |         |
|                         | 2 or more     |        | 1.803 (1.052–3.092)      |         |
| Histology               | SCC           | 0.180  | 1                        | 0.671   |
|                         | Non-SCC       |        | 1.070 (0.784–1.460)      |         |
| Tumor size, cm          |               | 7.658  | 1.124 (1.034–1.222)      | 0.006   |
| T stage                 | 1             | 12.203 | 1                        | <0.001  |
|                         | 2             |        | 1.865 (1.315–2.647)      |         |
| Lymphatic invasion      | No            | 1.048  | 1                        | 0.306   |
|                         | Yes           |        | 1.211 (0.839–1.747)      |         |
| Vascular invasion       | No            | 2.047  | 1                        | 0.153   |
|                         | Yes           |        | 1.296 (0.908–1.850)      |         |
| Type of surgery         | Lobectomy     | 1.416  | 1                        | 0.493   |
|                         | Bilobectomy   |        | 0.854 (0.472–1.543)      |         |
|                         | Pneumonectomy |        | 1.298 (0.783–2.153)      |         |
| Adjuvant chemotherapy   | No            | 0.154  | 1                        | 0.694   |
|                         | Yes           |        | 1.096 (0.693–1.736)      |         |

<sup>a</sup>, hazard ratio and 95% CI by Cox regression test. ECOG, Eastern Cooperative Oncology Group; CCIS, Charlson comorbidity index score; NA, not applicable; SCC, squamous cell carcinoma.

**Table S2** Information on antibodies for proteins involved in necroptosis and DNA damage response

| Antibody            | Clonality         | Dilution | Source               |
|---------------------|-------------------|----------|----------------------|
| RIPK3               | Rabbit polyclonal | 1:300    | Abcam ab72106        |
| MLKL (EPR17514)     | Rabbit monoclonal | 1:40     | Abcam ab184718       |
| PEL1 (F-7)          | Mouse monoclonal  | 1:20     | Santa Cruz sc-271065 |
| p53 (DO-7)          | Mouse monoclonal  | 1:1,000  | Dako M7001           |
| ATMpS1981 (7C10D8)  | Mouse monoclonal  | 1:600    | Rockland 200-301-500 |
| γH2AXpS139 (JBW301) | Mouse monoclonal  | 1:100    | Millipore 05-636     |
| Chk2pT68            | Rabbit polyclonal | 1:30     | Cell Signaling 2661s |
| BRCA1pS1423         | Rabbit polyclonal | 1:100    | Abcam ab47325        |
| ERCC1 (8F1)         | Mouse monoclonal  | 1:100    | GeneTex GTX22356     |

**Table S3** Proteins involved in necroptosis and DNA damage response and survival of patients with stage I NSCLC according to histology: univariate Cox model

| Proteins | Level        | Total |                          |         | SCC   |                          |         | Non-SCC |                          |         |
|----------|--------------|-------|--------------------------|---------|-------|--------------------------|---------|---------|--------------------------|---------|
|          |              | Wald  | HR (95% CI) <sup>a</sup> | P value | Wald  | HR (95% CI) <sup>a</sup> | P value | Wald    | HR (95% CI) <sup>a</sup> | P value |
| RIPK3    | Low vs. high | 2.797 | 1.306 (0.955–1.787)      | 0.094   | 6.387 | 1.773 (1.137–2.765)      | 0.011   | 0.138   | 0.920 (0.591–1.431)      | 0.710   |
| MLKL     | Low vs. high | 0.169 | 0.937 (0.686–1.279)      | 0.681   | 0.449 | 1.170 (0.740–1.849)      | 0.503   | 1.281   | 0.771 (0.491–1.210)      | 0.258   |
| PELI1    | Low vs. high | 1.524 | 1.217 (0.891–1.662)      | 0.217   | 5.535 | 1.768 (1.100–2.843)      | 0.019   | 0.478   | 0.853 (0.544–1.338)      | 0.489   |
| p53      | Low vs. high | 3.611 | 0.738 (0.540–1.010)      | 0.057   | 5.822 | 0.556 (0.346–0.896)      | 0.016   | 0.111   | 0.927 (0.595–1.445)      | 0.738   |
| BRCA1    | Low vs. high | 3.551 | 1.358 (0.988–1.868)      | 0.060   | 4.746 | 1.648 (1.051–2.583)      | 0.029   | 0.165   | 1.099 (0.697–1.731)      | 0.685   |
| H2AX     | Low vs. high | 3.253 | 1.347 (0.975–1.861)      | 0.071   | 3.741 | 1.561 (0.994–2.453)      | 0.053   | 0.210   | 1.116 (0.698–1.783)      | 0.647   |
| ATM      | Low vs. high | 2.992 | 1.328 (0.963–1.831)      | 0.084   | 1.293 | 1.299 (0.828–2.039)      | 0.256   | 1.348   | 1.315 (0.828–2.089)      | 0.246   |
| Chk2     | Low vs. high | 0.438 | 1.117 (0.805–1.549)      | 0.508   | 0.958 | 1.248 (0.801–1.947)      | 0.328   | 0.099   | 0.922 (0.556–1.530)      | 0.753   |
| ERCC1    | Low vs. high | 0.439 | 1.114 (0.810–1.533)      | 0.508   | 0.780 | 1.223 (0.783–1.910)      | 0.377   | 0.043   | 0.952 (0.594–1.525)      | 0.837   |

Expression of the proteins was classified into low and high by using a criterion of median value of all mean H-scores. <sup>a</sup> Hazard ratio and 95% CI by Cox regression test. SCC, squamous cell carcinoma.

**Table S4** Combined effects of proteins on survival of the patients with stage I SCC

| Proteins    | Level     | N  | Wald   | aHR (95% CI)            | P value | Q value* | P for interaction |
|-------------|-----------|----|--------|-------------------------|---------|----------|-------------------|
| RIPK3/p53   | High/low  | 41 | 15.573 | 1                       | 0.001   | 0.005    | <0.001            |
|             | Low/low   | 42 |        | 3.981 (1.238–12.797)    |         |          |                   |
|             | High/high | 65 |        | 4.123 (1.476–11.520)    |         |          |                   |
|             | Low/high  | 47 |        | 8.394 (2.856–24.677)    |         |          |                   |
| RIPK3/BRCA1 | High/high | 70 | 9.004  | 1                       | 0.029   | 0.048    | 0.003             |
|             | High/low  | 37 |        | 1.947 (0.857–4.421)     |         |          |                   |
|             | Low/high  | 24 |        | 2.597 (0.855–7.887)     |         |          |                   |
|             | Low/low   | 65 |        | 3.115 (1.465–6.623)     |         |          |                   |
| RIPK3/PELI1 | High/high | 61 | 7.898  | 1                       | 0.048   | 0.060    | 0.006             |
|             | High/low  | 45 |        | 1.635 (0.712–3.755)     |         |          |                   |
|             | Low/high  | 18 |        | 2.105 (0.642–6.906)     |         |          |                   |
|             | Low/low   | 71 |        | 2.927 (1.368–6.262)     |         |          |                   |
| PELI1/p53   | High/low  | 30 | 12.135 | 1                       | 0.007   | 0.018    | 0.001             |
|             | Low/low   | 53 |        | 3.474 (1.049 to 11.507) |         |          |                   |
|             | High/high | 49 |        | 4.393 (1.370 to 14.089) |         |          |                   |
|             | Low/high  | 63 |        | 6.760 (2.173 to 21.024) |         |          |                   |
| PELI1/BRCA1 | High/high | 50 | 7.748  | 1                       | 0.052   | 0.052    | 0.007             |
|             | High/low  | 29 |        | 1.938 (0.720 to 5.219)  |         |          |                   |
|             | Low/high  | 43 |        | 1.902 (0.704 to 5.135)  |         |          |                   |
|             | Low/low   | 73 |        | 3.285 (1.376 to 7.845)  |         |          |                   |

\*, FDR corrected p values after adjustment for multiple comparisons. Expression of the proteins was classified into low and high by using a criterion of median value of all mean H-scores. aHR, hazard ratio adjusted with age, gender, smoking habit, Eastern Cooperative Oncology Group performance status, Charlson comorbidity index score, tumor size, T stage, lymphatic or vascular invasion, type of surgery, and adjuvant chemotherapy. SCC, squamous cell carcinoma.

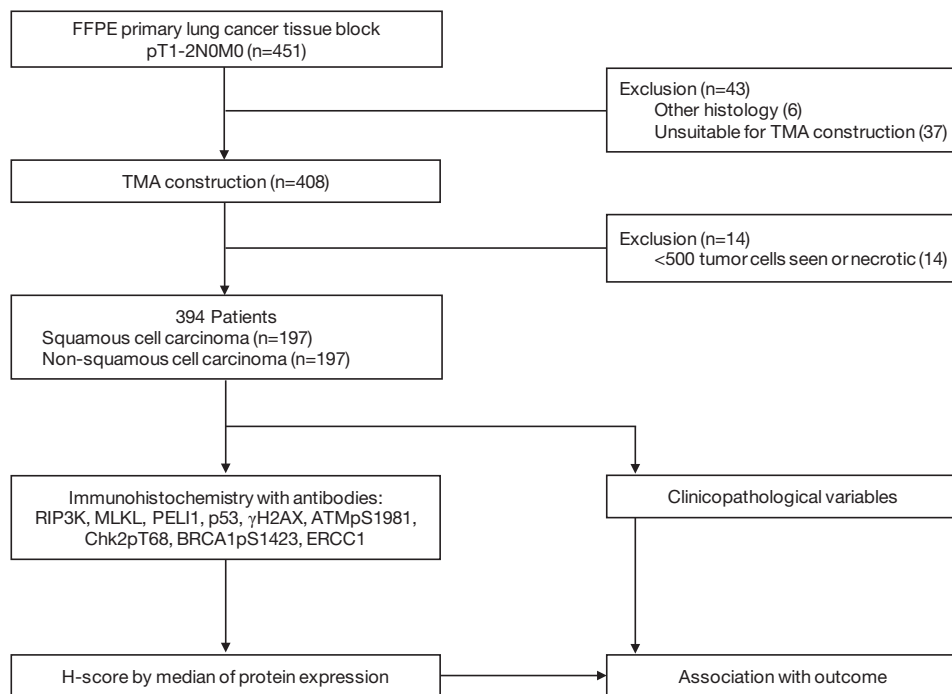

**Figure S1** Study schema: patients' enrollment and immunohistochemistry.

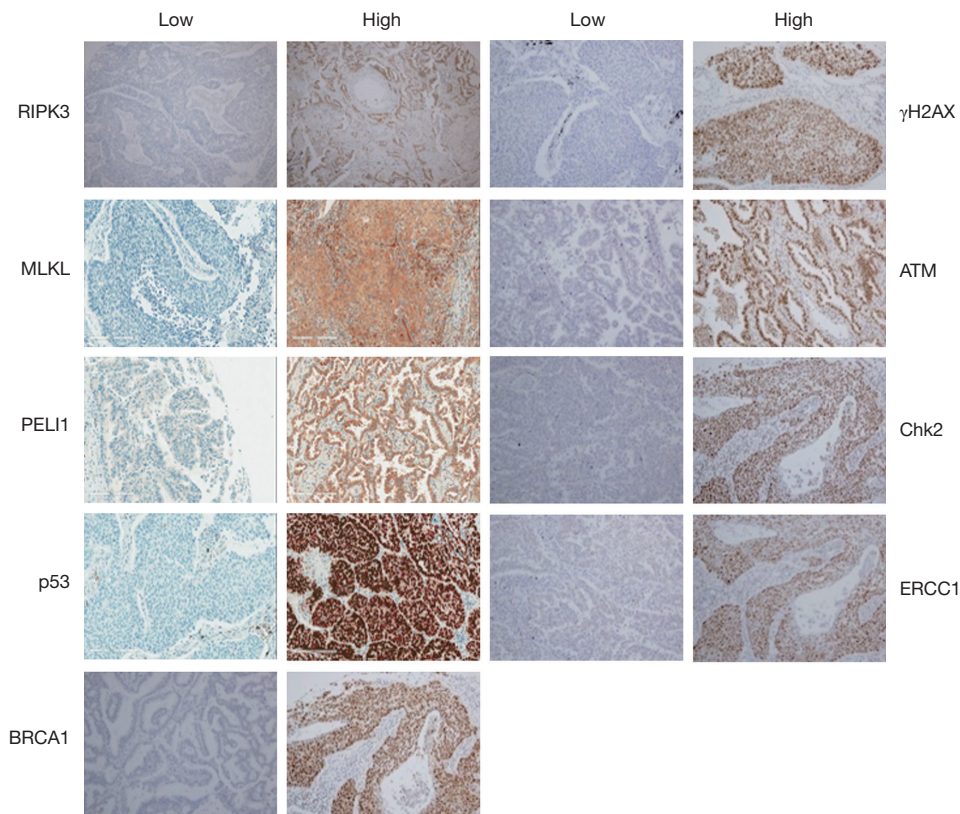

**Figure S2** Images for immunohistochemistry in proteins involved in necroptosis and DDR. Expression of the proteins was classified into low and high by using a criterion of median value of all mean H-scores (HE,  $\times 200$ ). DDR, DNA damage response.
